# Supplementary material for: Recent advances of tryptanthrin and its derivatives as potential anticancer agents
Source: Royal Society of Chemistry journal article supplement (doi:10.1039/d3md00698k), 2024-01-01
Supplement: d3md00698k1.pdf [file d3md00698k1.pdf]

## Supporting information

### Recent advance of tryptanthrin and its derivatives as the potential anticancer agents

Xiaofeng Zhou

Second Clinical Medicine College of Lanzhou University, Lanzhou, China

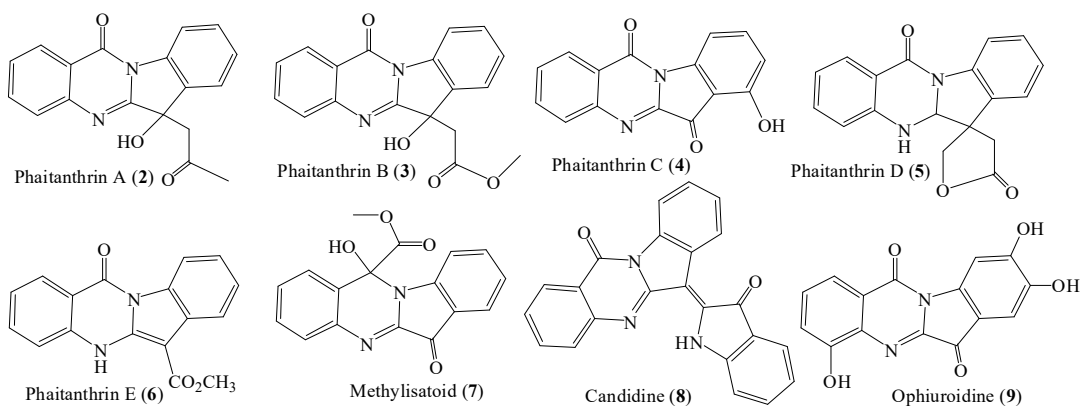

Scheme S1 Tryptanthrin derivatives isolated from natural sources
